# Supplementary material for: Long-Term Health Outcomes of Lecanemab in Patients with Early Alzheimer’s Disease Using Simulation Modeling
Source: PubMed Central journal article supplement — Neurol Ther. 2022 Apr 25;11(2):863–80. doi: 10.1007/s40120-022-00350-y (PMC9095799; doi:10.1007/s40120-022-00350-y), 2022-04-25
Supplement: 40120_2022_350_MOESM1_ESM.pdf [file 40120_2022_350_MOESM1_ESM.pdf]

# **Long-Term Health Outcomes of Lecanemab in Patients with Early Alzheimer’s Disease Using Simulation Modeling**

## **Author details:**

Amir Abbas Tahami Monfared\*<sup>1,2</sup>, Ali Tafazzoli<sup>3</sup>, Weicheng Ye<sup>3</sup>, Ameya Chavan<sup>3</sup>, Quanwu Zhang<sup>1</sup>

<sup>1</sup>Eisai Inc., 200 Metro Blvd., Nutley, NJ 07110

<sup>2</sup>McGill University, Epidemiology, Biostatistics, and Occupational Health, Montreal, QC, Canada

<sup>3</sup>Evidence Synthesis, Modeling & Communication, Evidera Inc., Bethesda, MD 20814, USA

## **Correspondence details:**

Amir Abbas Tahami Monfared  
amir\_tahami@eisai.com

## SUPPLEMENTARY MATERIAL

**Supplementary Table S1. Patient Characteristics for Subsets Explored in Scenario Analyses**

| Baseline Characteristic               | MCI Due to AD | Mild AD Dementia | Mean Baseline Age of 65 years | MCI due to AD and mean baseline age of 65 years | CSF t-tau Quintile |             |              |              |              |
|---------------------------------------|---------------|------------------|-------------------------------|-------------------------------------------------|--------------------|-------------|--------------|--------------|--------------|
|                                       |               |                  |                               |                                                 | 1st                | 2nd         | 3rd          | 4th          | 5th          |
| Number of ADNI patients in the subset | 352           | 77               | 149                           | 123                                             | 85                 | 87          | 85           | 87           | 85           |
| Age, median (range), years            | 72 (55-80)    | 73 (55-80)       | 65 (55-70)                    | 65 (55-70)                                      | 71 (55-80)         | 71 (55-80)  | 71 (55-80)   | 72 (55-80)   | 72 (55-80)   |
| PET SUVR, mean (SD)                   | 1.37 (0.14)   | 1.40 (0.15)      | 1.36 (0.14)                   | 1.35 (0.14)                                     | 1.33 (0.14)        | 1.40 (0.14) | 1.36 (0.13)  | 1.38 (0.14)  | 1.40 (0.15)  |
| MMSE, mean (SD)                       | 26.34 (2.03)  | 24.16 (1.50)     | 26.17 (2.08)                  | 26.61 (1.92)                                    | 26.68 (2.14)       | 26.02 (2.1) | 25.91 (2.27) | 25.76 (2.07) | 25.35 (1.86) |
| CDR-SB, mean (SD)                     | 2.21 (0.93)   | 5.33 (1.04)      | 2.64 (1.48)                   | 2.13 (0.92)                                     | 2.45 (1.41)        | 2.76 (1.64) | 2.78 (1.45)  | 2.77 (1.55)  | 3.01 (1.51)  |

Abbreviations: AD = Alzheimer's disease; ADNI = Alzheimer's Disease Neuroimaging Initiative; CDR-SB = Clinical Dementia Rating Sum of Boxes; CSF t-tau = cerebrospinal fluid total-tau; MCI = mild cognitive impairment; MMSE = Mini-Mental State Examination; PET = positron emission tomography; SUVR = standard uptake value ratio

**Supplementary Table S2. Base-case Model Outcomes over 5- and 10-Year Time horizons**

| Modeled Health Outcomes                                     | 5-year Time Horizon |                    |             | 10-year Time Horizon |                    |             |
|-------------------------------------------------------------|---------------------|--------------------|-------------|----------------------|--------------------|-------------|
|                                                             | SoC                 | Lecanemab + SoC    | Incremental | SoC                  | Lecanemab + SoC    | Incremental |
| <b>Patients with/progressed to mild AD dementia, %</b>      | <b>83%</b>          | <b>69%</b>         | <b>-14%</b> | <b>90%</b>           | <b>81%</b>         | <b>-9%</b>  |
| Patients with mild AD dementia at baseline                  | 17%                 | 17%                | 0%          | 17%                  | 17%                | 0%          |
| Patients progressed to mild AD dementia                     | 66%                 | 52%                | -14%        | 73%                  | 64%                | -9%         |
| <b>Patients progressed to moderate AD dementia, %</b>       | <b>33%</b>          | <b>18%</b>         | <b>-15%</b> | <b>58%</b>           | <b>42%</b>         | <b>-16%</b> |
| <b>Patients progressed to severe AD dementia, %</b>         | <b>3%</b>           | <b>1%</b>          | <b>-2%</b>  | <b>29%</b>           | <b>17%</b>         | <b>-12%</b> |
| <b>Patients institutionalized, %</b>                        | <b>9%</b>           | <b>7%</b>          | <b>-2%</b>  | <b>26%</b>           | <b>19%</b>         | <b>-7%</b>  |
| <b>Patients discontinued treatment, %</b>                   | <b>NA</b>           | <b>18%</b>         | <b>NA</b>   | <b>NA</b>            | <b>40%</b>         | <b>NA</b>   |
| <b>Mean time to event<sup>†</sup> (undiscounted, years)</b> |                     |                    |             |                      |                    |             |
| Mild AD                                                     | 2.49 (2.39 - 2.58)  | 3.19 (3.09 - 3.28) | 0.7         | 2.83 (2.68 - 2.99)   | 4.23 (4.03 - 4.43) | 1.4         |
| Moderate AD                                                 | 4.24 (4.17 - 4.30)  | 4.52 (4.45 - 4.58) | 0.28        | 5.50 (5.33 - 5.68)   | 6.77 (6.58 - 6.96) | 1.27        |
| Severe AD                                                   | 4.87 (4.83 - 4.89)  | 4.90 (4.85 - 4.92) | 0.03        | 7.73 (7.56 - 7.89)   | 8.42 (8.25 - 8.58) | 0.69        |
| Institutional care                                          | 3.09 (2.82 - 3.32)  | 3.02 (2.70 - 3.29) | -0.07       | 5.79 (5.48 - 6.07)   | 5.84 (5.47 - 6.18) | 0.05        |

| <b>Median time to event (years)</b>                  |                           |                           |              |                           |                           |              |  |
|------------------------------------------------------|---------------------------|---------------------------|--------------|---------------------------|---------------------------|--------------|--|
| Mild AD                                              | 2.15                      | 3.14                      | 0.99         | 2.15                      | 3.14                      | 0.99         |  |
| Moderate AD                                          | NR                        | NR                        | NA           | 5.10                      | 6.75                      | 1.65         |  |
| Severe AD                                            | NR                        | NR                        | NA           | 7.77                      | 8.89                      | 1.13         |  |
| Institutional care                                   | 3.26                      | 3.16                      | -0.10        | 6.06                      | 6.05                      | -0.01        |  |
| <b>Median time to event (of those alive) (years)</b> |                           |                           |              |                           |                           |              |  |
| Mild AD                                              | 1.84                      | 2.71                      | 0.87         | 1.84                      | 2.71                      | 0.87         |  |
| Moderate AD                                          | NR                        | NR                        | NA           | 5.59                      | 9.03                      | 3.44         |  |
| Severe AD                                            | NR                        | NR                        | NA           | NR                        | NR                        | NA           |  |
| Institutional care                                   | NR                        | NR                        | NA           | NR                        | NR                        | NA           |  |
| <b>Time on treatment (undiscounted, years)</b>       |                           |                           |              |                           |                           |              |  |
| <b>Total LYs (undiscounted)</b>                      | <b>4.27 (4.22 - 4.33)</b> | <b>4.33 (4.28 - 4.39)</b> | <b>0.06</b>  | <b>6.54 (6.41 - 6.67)</b> | <b>6.93 (6.80 - 7.06)</b> | <b>0.39</b>  |  |
| <b>Time in community care</b>                        | <b>4.12</b>               | <b>4.21</b>               | <b>0.09</b>  | <b>5.89</b>               | <b>6.42</b>               | <b>0.53</b>  |  |
| MCI due to AD                                        | 2.11                      | 2.61                      | 0.5          | 2.36                      | 3.31                      | 0.95         |  |
| Mild AD                                              | 1.72                      | 1.46                      | -0.26        | 2.34                      | 2.32                      | -0.02        |  |
| Moderate AD                                          | 0.28                      | 0.15                      | -0.13        | 0.97                      | 0.68                      | -0.29        |  |
| Severe AD                                            | 0.01                      | 0                         | -0.01        | 0.22                      | 0.11                      | -0.11        |  |
| <b>Time in institutional care</b>                    | <b>0.15 (0.12 - 0.18)</b> | <b>0.12 (0.10 - 0.14)</b> | <b>-0.03</b> | <b>0.65 (0.59 - 0.72)</b> | <b>0.51 (0.45 - 0.57)</b> | <b>-0.14</b> |  |
| MCI due to AD                                        | 0                         | 0                         | 0            | 0.00                      | 0.00                      | 0.00         |  |
| Mild AD                                              | 0.08                      | 0.09                      | 0            | 0.13                      | 0.16                      | 0.03         |  |
| Moderate AD                                          | 0.06                      | 0.03                      | -0.03        | 0.29                      | 0.22                      | -0.07        |  |
| Severe AD                                            | 0                         | 0                         | 0            | 0.23                      | 0.13                      | -0.11        |  |
| <b>Total LYs (discounted)</b>                        | <b>3.99</b>               | <b>4.04</b>               | <b>0.05</b>  | <b>5.82</b>               | <b>6.14</b>               | <b>0.31</b>  |  |
| <b>Total QALYs (discounted)</b>                      | <b>2.94 (2.90 - 2.98)</b> | <b>3.05 (3.01 - 3.09)</b> | <b>0.11</b>  | <b>3.97 (3.89 - 4.04)</b> | <b>4.40 (4.32 - 4.48)</b> | <b>0.43</b>  |  |
| Patient QALYs, total                                 | 3.02                      | 3.11                      | 0.09         | 3.80                      | 4.26                      | 0.46         |  |
| Lost to ARIA AEs                                     | NA                        | 0.001                     | NA           | NA                        | -0.001                    | NA           |  |
| Caregiver QALYs lost                                 | 0.077                     | 0.058                     | -0.02        | -0.17                     | -0.14                     | 0.03         |  |
| <b>Total EvLYG (discounted)</b>                      | <b>2.94</b>               | <b>3.06</b>               | <b>0.12</b>  | <b>3.97</b>               | <b>4.46</b>               | <b>0.49</b>  |  |

Abbreviations: AD = Alzheimer's disease; AE = adverse event; ARIA = amyloid-related imaging abnormalities; EvLYG = equal value of life-years gained; LY = life-year; MCI = mild cognitive impairment; NA = not applicable; QALY = quality-adjusted life-year; SoC = standard of care

<sup>†</sup>The average survival from time 0 to a specified time point was estimated as the area under the survival curve up to that point.

### Supplementary Table S3. Scenario Analysis Results (Median Time to Event)

| Scenarios                                                                                                              | Median Time to Mild AD Dementia |                 |      | Median Time to Moderate AD Dementia |                 |      |
|------------------------------------------------------------------------------------------------------------------------|---------------------------------|-----------------|------|-------------------------------------|-----------------|------|
|                                                                                                                        | SoC                             | Lecanemab + SoC | INC  | SoC                                 | Lecanemab + SoC | INC  |
| <b>Base-case analysis</b>                                                                                              | 2.15                            | 3.14            | 0.99 | 5.15                                | 7.10            | 1.95 |
| <b>Subsets (base-case population: MCI due to AD and mild AD dementia with confirmed A<math>\beta</math> pathology)</b> |                                 |                 |      |                                     |                 |      |
| Disease severity and baseline age                                                                                      |                                 |                 |      |                                     |                 |      |
| MCI due to AD                                                                                                          | 2.14                            | 3.32            | 1.18 | 5.64                                | 7.81            | 2.17 |
| Mild AD dementia                                                                                                       | NA                              | NA              | NA   | 2.93                                | 3.81            | 0.89 |
| Mean baseline age of 65 years                                                                                          | 2.43                            | 3.83            | 1.40 | 5.43                                | 7.40            | 1.97 |
| MCI due to AD + mean baseline age of 65 years                                                                          | 2.54                            | 3.99            | 1.45 | 6.03                                | 8.32            | 2.29 |
| CSF t-tau level                                                                                                        |                                 |                 |      |                                     |                 |      |
| 1st CSF t-tau quintile                                                                                                 | 2.77                            | 4.90            | 2.13 | 6.50                                | 9.20            | 2.70 |
| 2nd CSF t-tau quintile                                                                                                 | 2.25                            | 3.62            | 1.37 | 5.44                                | 7.53            | 2.10 |
| 3rd CSF t-tau quintile                                                                                                 | 2.25                            | 3.48            | 1.23 | 5.35                                | 7.53            | 2.18 |
| 4th CSF t-tau quintile                                                                                                 | 2.01                            | 2.91            | 0.91 | 5.05                                | 6.93            | 1.87 |
| 5th CSF t-tau quintile                                                                                                 | 1.81                            | 2.36            | 0.56 | 4.33                                | 5.62            | 1.30 |
| <b>Time horizon (base-case: lifetime)</b>                                                                              |                                 |                 |      |                                     |                 |      |
| 5 years                                                                                                                | -                               | -               | -    | NR                                  | NR              | NA   |
| 10 years                                                                                                               | -                               | -               | -    | 5.10                                | 6.75            | 1.65 |
| <b>Mortality approach (base-case source: Andersen et al. 2010)</b>                                                     |                                 |                 |      |                                     |                 |      |
| Wimo et al. 2020                                                                                                       | 2.16                            | 3.14            | 0.99 | 4.94                                | 6.56            | 1.63 |
| <b>Annual discontinuation risk (base-case: 0.0%)</b>                                                                   |                                 |                 |      |                                     |                 |      |
| 10.00%                                                                                                                 | -                               | 3.13            | 0.97 | -                                   | 7.07            | 1.92 |
| 17.3% (risk observed in trial)                                                                                         | -                               | 3.11            | 0.96 | -                                   | 6.91            | 1.76 |
| 20.00%                                                                                                                 | -                               | 3.10            | 0.94 | -                                   | 6.90            | 1.75 |
| <b>Treatment stopping rule (base-case rule: stop at moderate AD dementia)</b>                                          |                                 |                 |      |                                     |                 |      |
| Base-case rule + 1.5 years treatment duration                                                                          | -                               | 3.08            | 0.92 | -                                   | 6.48            | 1.33 |
| Base-case rule + 1.5 years treatment duration + maintain reduced amyloid level                                         | -                               | 3.04            | 0.89 | -                                   | 6.76            | 1.61 |
| Base-case rule + 3 years treatment duration                                                                            | -                               | 3.14            | 0.99 | -                                   | 7.18            | 2.03 |
| Base-case rule + 5 years treatment duration                                                                            | -                               | 3.14            | 0.99 | -                                   | 7.21            | 2.06 |

Abbreviations: A $\beta$  beta-amyloid; AD = Alzheimer's disease; CSF t-tau = cerebrospinal fluid total-tau; INC = incremental; MCI = Mild cognitive impairment; SoC= standard of care

**Supplementary Table S4. Scenario Analysis Results (Median Time to Event [of Those Alive])**

| Scenarios                                                                                                              | Median Time to Mild AD Dementia |                 |      | Median Time to Moderate AD Dementia |                 |      |
|------------------------------------------------------------------------------------------------------------------------|---------------------------------|-----------------|------|-------------------------------------|-----------------|------|
|                                                                                                                        | SoC                             | Lecanemab + SoC | INC  | SoC                                 | Lecanemab + SoC | INC  |
| <b>Base-case analysis</b>                                                                                              | 1.84                            | 2.71            | 0.87 | 5.59                                | 9.03            | 3.44 |
| <b>Subsets (base-case population: MCI due to AD and mild AD dementia with confirmed A<math>\beta</math> pathology)</b> |                                 |                 |      |                                     |                 |      |
| Disease severity and baseline age                                                                                      |                                 |                 |      |                                     |                 |      |
| MCI due to AD                                                                                                          | 2.23                            | 3.55            | 1.32 | 6.01                                | 9.79            | 3.78 |
| Mild AD dementia                                                                                                       | NA                              | NA              | NA   | 2.90                                | 3.83            | 0.93 |
| Mean baseline age of 65 years                                                                                          | 2.08                            | 3.15            | 1.07 | 5.88                                | 9.10            | 3.22 |
| MCI due to AD + mean baseline age of 65 years                                                                          | 2.57                            | 4.15            | 1.58 | 6.51                                | 11.23           | 4.71 |
| CSF t-tau level                                                                                                        |                                 |                 |      |                                     |                 |      |
| 1st CSF t-tau quintile                                                                                                 | 2.61                            | 4.84            | 2.23 | 7.61                                | NR              | NA   |
| 2nd CSF t-tau quintile                                                                                                 | 1.91                            | 2.97            | 1.06 | 5.85                                | NR              | NA   |
| 3rd CSF t-tau quintile                                                                                                 | 1.85                            | 2.74            | 0.89 | 5.74                                | 8.95            | 3.21 |
| 4th CSF t-tau quintile                                                                                                 | 1.75                            | 2.48            | 0.74 | 5.34                                | 7.83            | 2.48 |
| 5th CSF t-tau quintile                                                                                                 | 1.46                            | 1.92            | 0.46 | 4.58                                | 6.04            | 1.46 |
| <b>Time horizon (base-case: lifetime)</b>                                                                              |                                 |                 |      |                                     |                 |      |
| 5 years                                                                                                                | -                               | -               | -    | NR                                  | NR              | NA   |
| 10 years                                                                                                               | -                               | -               | -    | 5.59                                | 9.03            | 3.44 |
| <b>Mortality approach (base-case source: Andersen et al. 2010)</b>                                                     |                                 |                 |      |                                     |                 |      |
| Wimo et al. 2020                                                                                                       | 1.80                            | 2.54            | 0.74 | 5.30                                | 7.51            | 2.21 |
| <b>Annual discontinuation risk (base-case: 0.0%)</b>                                                                   |                                 |                 |      |                                     |                 |      |
| 10.00%                                                                                                                 | -                               | 2.71            | 0.87 | -                                   | 8.57            | 2.99 |
| 17.3% (risk observed in trial)                                                                                         | -                               | 2.70            | 0.86 | -                                   | 8.39            | 2.81 |
| 20.00%                                                                                                                 | -                               | 2.70            | 0.86 | -                                   | 8.25            | 2.67 |
| <b>Treatment stopping rule (base-case rule: stop at moderate AD dementia)</b>                                          |                                 |                 |      |                                     |                 |      |
| Base-case rule + 1.5 years treatment duration                                                                          | -                               | 2.72            | 0.88 | -                                   | 7.15            | 1.57 |
| Base-case rule + 1.5 years treatment duration + maintain reduced amyloid level                                         | -                               | 2.67            | 0.83 | -                                   | 7.75            | 2.16 |
| Base-case rule + 3 years treatment duration                                                                            | -                               | 2.71            | 0.87 | -                                   | 8.53            | 2.95 |
| Base-case rule + 5 years treatment duration                                                                            | -                               | 2.71            | 0.87 | -                                   | 8.86            | 3.27 |

Abbreviations: A $\beta$  beta-amyloid; AD = Alzheimer's disease; CSF t-tau = cerebrospinal fluid total-tau; INC = incremental; MCI = Mild cognitive impairment; SoC= standard of care
